# Supplementary material
Source: PubMed Central journal article supplement (PMC5554414)
Supplement: NIHMS890310-supplement-supp.pdf [file NIHMS890310-supplement-supp.pdf]

## SUPPLEMENTARY MATERIAL

**Supplemental Table S1:** HDI and incidence rates [7] for neuroblastoma (NB), retinoblastoma (RB) and Wilms tumor (WT). Registry start and end dates are shown, with midpoint chosen as the arithmetic mean rounded up to the nearest year. The date range for the registry for Kuwait was non-continuous, so more recent HDI was selected. HDI corresponding to the midpoint date was selected (<http://hdr.undp.org/en/data-explorer>). When multiple registries were available from a single country, the largest population was chosen. Those not included in the analysis are shaded and italicized. Registries for which HDI or incidence data were unavailable were not included in the analysis and are listed below the table.

**Supplemental Table S2:** Risk SNP allele frequency and incidence.

To examine whether variations in common polymorphisms across populations may correlate with tumor incidence (with and without controlling for HDI), we identified SNPs that have been shown to confer risk to neuroblastoma and Wilms tumor and considered their distribution across populations for which incidence and HDI data were available.

We first identified 10 neuroblastoma and 7 Wilms tumor risk SNPs from the NHGRI-EBI genome-wide association studies (GWAS) catalog [13]. As several of the neuroblastoma risk SNPs seem to have stronger reported association with high-risk disease (including those in *BARD1* and *LMO1*) [9,11,15], we additionally included three SNPs in *DUSP12* (rs1027702), *IL31RA* (rs2619046), and *HSD17B12* (rs11037575) associated with low-risk disease [12] although only one of these three reached genome-wide significance. We extracted 1000 Genomes (phase 3) risk allele frequencies for each SNP using the Geography of Genetic Variants (GGV) browser [21]. While a larger number of populations were available using other datasets, the 1000 Genomes dataset provided the most robust numbers of genotyped individuals per country, and was thus used in this analysis. We excluded one Wilms tumor SNP (rs5955543) due to lack of genotyping data in the 1000 Genomes dataset. We then matched nine 1000 Genomes populations with the closest registry (as shown in Supplemental Table S3). For each SNP, we tested the risk allele frequency for association with incidence rates using linear regression, with and without controlling for HDI. We adjusted for multiple testing using the Benjamini-Hochberg procedure at a False Discovery Rate of 5% [22].

After correcting for multiple testing, we did not observe significant associations between neuroblastoma or Wilms tumor incidence and SNP risk allele frequency with and without controlling for HDI.

**Supplemental Table S3:** Nine matched populations used for analysis of SNP allele frequency and incidence. IARC registry population (left) and matching 1000 genomes population (right) are shown.

### **Supplemental References**

21. Marcus JH, Novembre J. June 9, 2016. Geography of Genetic Variants Browser v0.1. <<http://www.popgen.uchicago/ggv/>>. June 9, 2016.
22. Benjamini Y, Hochberg Y. Controlling the false discovery rate: a practical and powerful approach to multiple testing. *Journal of the Royal Statistical Society Series B (Methodological)* 1995;57(1):289-300.

**SUPPLEMENTAL TABLE S1**

| Country                                     | Registry start date | Registry end date | Midpoint date of registry | HDI from midpoint           | RATE (NB)   | RATE (RB)   | RATE (WT)   |
|---------------------------------------------|---------------------|-------------------|---------------------------|-----------------------------|-------------|-------------|-------------|
| Algeria, Setif                              | 1986                | 1995              | 1991                      | 0.58                        | 6.1         | 1.4         | 4.7         |
| Brazil, Belem                               | 1987                | 1991              | 1989                      | 0.60                        | 4.6         | 15.4        | 10.8        |
| <i>Brazil, Goiania</i>                      | <i>1989</i>         | <i>1994</i>       | <i>1992</i>               | <i>0.62</i>                 | <i>5.5</i>  | <i>9.1</i>  | <i>18.2</i> |
| Bulgaria                                    | 1980                | 1989              | 1985                      | 0.69                        | 7.9         | 3.4         | 7.4         |
| Canada                                      | 1982                | 1991              | 1987                      | 0.84                        | 26.4        | 10.1        | 18.4        |
| China, Tianjin                              | 1981                | 1992              | 1987                      | 0.48                        | 6.4         | 6.4         | 4.6         |
| Colombia, Cali                              | 1982                | 1991              | 1987                      | 0.58                        | 7.8         | 17.1        | 15.6        |
| Costa Rica                                  | 1984                | 1992              | 1988                      | 0.64                        | 10          | 15.7        | 11.2        |
| Cuba                                        | 1986                | 1990              | 1988                      | 0.67                        | 17.2        | 8.5         | 11.3        |
| Denmark                                     | 1983                | 1991              | 1987                      | 0.79                        | 25.3        | 15.3        | 20.9        |
| Ecuador, Quito                              | 1985                | 1992              | 1989                      | 0.64                        | 5.9         | 16.6        | 5.9         |
| Egypt, Alexandria                           | 1980                | 1989              | 1985                      | 0.51                        | 10.9        | 1.5         | 8.1         |
| Finland                                     | 1980                | 1989              | 1985                      | 0.76                        | 23.8        | 11          | 21          |
| France                                      | 1983                | 1992              | 1988                      | 0.76                        | 32.7        | 8.4         | 16.8        |
| <i>France, Lorraine</i>                     | <i>1983</i>         | <i>1992</i>       | <i>1988</i>               | <i>0.76</i>                 | <i>24.5</i> | <i>6.7</i>  | <i>14.7</i> |
| <i>France, PACA &amp; Corsica</i>           | <i>1984</i>         | <i>1992</i>       | <i>1988</i>               | <i>0.76</i>                 | <i>36.7</i> | <i>8.5</i>  | <i>15.3</i> |
| Germany                                     | 1991                | 1995              | 1993                      | 0.82                        | 26.5        | 8.1         | 20.4        |
| <i>Germany, former FRG</i>                  | <i>1985</i>         | <i>1990</i>       | <i>1988</i>               | <i>NA</i>                   | <i>26.1</i> | <i>10.7</i> | <i>19.6</i> |
| <i>Germany, former GDR</i>                  | <i>1981</i>         | <i>1989</i>       | <i>1985</i>               | <i>NA</i>                   | <i>21.2</i> | <i>9.2</i>  | <i>16.5</i> |
| Hong Kong                                   | 1980                | 1989              | 1985                      | 0.74                        | 17.5        | 14.4        | 10          |
| Hungary                                     | 1985                | 1990              | 1988                      | 0.71                        | 21.8        | 5.6         | 12          |
| India, Bombay                               | 1980                | 1992              | 1986                      | 0.40                        | 6.7         | 10.6        | 7.1         |
| <i>India, Bangalore</i>                     | <i>1982</i>         | <i>1992</i>       | <i>1987</i>               | <i>0.41</i>                 | <i>5</i>    | <i>7.1</i>  | <i>6.9</i>  |
| <i>India, Delhi</i>                         | <i>1988</i>         | <i>1992</i>       | <i>1990</i>               | <i>0.43</i>                 | <i>5.8</i>  | <i>12</i>   | <i>12.4</i> |
| <i>India, Madras</i>                        | <i>1982</i>         | <i>1992</i>       | <i>1987</i>               | <i>0.41</i>                 | <i>4.3</i>  | <i>19.6</i> | <i>9.8</i>  |
| <i>India, Poona</i>                         | <i>1980</i>         | <i>1992</i>       | <i>1986</i>               | <i>0.40</i>                 | <i>7</i>    | <i>7.3</i>  | <i>4.2</i>  |
| Israel, Jews                                | 1980                | 1989              | 1985                      | 0.77                        | 34.6        | 9.1         | 14.8        |
| <i>Israel, non-Jews</i>                     | <i>1980</i>         | <i>1989</i>       | <i>1985</i>               | <i>0.77</i>                 | <i>19.8</i> | <i>11.2</i> | <i>14.6</i> |
| Italy                                       | 1980                | 1991              | 1986                      | 0.74                        | 25.8        | 5.4         | 15.9        |
| <i>Italy, Piedmont</i>                      | <i>1982</i>         | <i>1989</i>       | <i>1986</i>               | <i>0.74</i>                 | <i>30.6</i> | <i>4.8</i>  | <i>14.3</i> |
| Japan                                       | 1980                | 1992              | 1986                      | 0.80                        | 28.7        | 12.2        | 9           |
| <i>Japan, Osaka</i>                         | <i>1981</i>         | <i>1989</i>       | <i>1985</i>               | <i>0.79</i>                 | <i>29.8</i> | <i>10.6</i> | <i>11.1</i> |
| Korea (Republic of), Seoul                  | 1992                | 1994              | 1993                      | 0.76                        | 15.2        | 9.3         | 5.1         |
| Kuwait, Kuwaiti                             | 1983, 1992          | 1989, 1993        | 1986; 1993                | .73; .74<br>(0.74 selected) | 12.7        | 3.4         | 8.4         |
| <i>Kuwait, non-Kuwaiti</i>                  | <i>1983, 1992</i>   | <i>1989, 1993</i> | <i>1986; 1993</i>         | <i>.73; .74</i>             | <i>22.8</i> | <i>3.3</i>  | <i>10.9</i> |
| Malawi, Blantyre                            | 1991                | 1995              | 1993                      | 0.31                        | NA          | 10.7        | 3.6         |
| Mali, Bamako                                | 1987                | 1995              | 1991                      | 0.24                        | NA          | 42.5        | 7.1         |
| Netherlands                                 | 1989                | 1992              | 1991                      | 0.84                        | 17.2        | 13.8        | 16.9        |
| New Zealand, non-Maori                      | 1980                | 1992              | 1986                      | 0.81                        | 24.5        | 18.6        | 24.1        |
| <i>New Zealand, Maori</i>                   | <i>1970</i>         | <i>1992</i>       | <i>1981</i>               | <i>0.80</i>                 | <i>28.4</i> | <i>17.8</i> | <i>11.8</i> |
| Norway                                      | 1980                | 1989              | 1985                      | 0.83                        | 25.9        | 15.4        | 16.6        |
| Peru, Lima                                  | 1990                | 1991              | 1991                      | 0.62                        | 5.7         | 15.5        | 7.3         |
| Philippines, Manila and Rizal               | 1983                | 1992              | 1988                      | 0.58                        | 4.5         | 17.4        | 7.8         |
| Poland                                      | 1980                | 1989              | 1985                      | 0.70                        | 10.8        | 5.4         | 16.2        |
| Portugal                                    | 1989                | 1992              | 1991                      | 0.72                        | 26.6        | 10.9        | 16.4        |
| Spain                                       | 1980                | 1991              | 1986                      | 0.73                        | 25          | 11.1        | 13.6        |
| <i>Spain, Valencia</i>                      | <i>1983</i>         | <i>1990</i>       | <i>1987</i>               | <i>0.74</i>                 | <i>17.8</i> | <i>17.8</i> | <i>11.9</i> |
| Sweden                                      | 1983                | 1989              | 1986                      | 0.80                        | 18.2        | 11          | 22.6        |
| Switzerland                                 | 1980                | 1992              | 1986                      | 0.82                        | 31.7        | 12.4        | 13.8        |
| Thailand                                    | 1983                | 1993              | 1988                      | 0.56                        | 5.9         | 10          | 6.7         |
| Uganda, Kampala                             | 1992                | 1995              | 1994                      | 0.32                        | 2.5         | 24          | 17.7        |
| United Kingdom, England & Wales             | 1981                | 1990              | 1986                      | 0.76                        | 20.9        | 9.3         | 16          |
| <i>United Kingdom, Scotland</i>             | <i>1981</i>         | <i>1990</i>       | <i>1986</i>               | <i>0.76</i>                 | <i>17.9</i> | <i>13.9</i> | <i>16.6</i> |
| Uruguay                                     | 1988                | 1992              | 1990                      | 0.69                        | 4.7         | 7           | 14.8        |
| USA, SEER, White                            | 1983                | 1992              | 1988                      | 0.85                        | 30.2        | 12          | 19.6        |
| <i>USA, Greater Delaware Valley, Black</i>  | <i>1980</i>         | <i>1989</i>       | <i>1985</i>               | <i>0.84</i>                 | <i>26</i>   | <i>14</i>   | <i>23</i>   |
| <i>USA, Greater Delaware Valley, White</i>  | <i>1980</i>         | <i>1989</i>       | <i>1985</i>               | <i>0.84</i>                 | <i>29.9</i> | <i>9.8</i>  | <i>20.8</i> |
| <i>USA, Los Angeles, Black</i>              | <i>1984</i>         | <i>1992</i>       | <i>1988</i>               | <i>0.85</i>                 | <i>21.5</i> | <i>6.3</i>  | <i>22.8</i> |
| <i>USA, Los Angeles, Hispanic</i>           | <i>1984</i>         | <i>1992</i>       | <i>1988</i>               | <i>0.85</i>                 | <i>24.1</i> | <i>13.3</i> | <i>20</i>   |
| <i>USA, Los Angeles, non-Hispanic white</i> | <i>1984</i>         | <i>1992</i>       | <i>1988</i>               | <i>0.85</i>                 | <i>32.2</i> | <i>13.4</i> | <i>19.3</i> |
| <i>USA, New York, Black</i>                 | <i>1983</i>         | <i>1991</i>       | <i>1987</i>               | <i>0.85</i>                 | <i>19.2</i> | <i>11.9</i> | <i>20</i>   |
| <i>USA, New York, White</i>                 | <i>1983</i>         | <i>1991</i>       | <i>1987</i>               | <i>0.85</i>                 | <i>27.9</i> | <i>10.2</i> | <i>18.9</i> |
| <i>USA, SEER, Black</i>                     | <i>1983</i>         | <i>1992</i>       | <i>1988</i>               | <i>0.85</i>                 | <i>23.3</i> | <i>13.8</i> | <i>18.1</i> |
| <i>USA, SEER, Hawaii, Hawaiian</i>          | <i>1973</i>         | <i>1992</i>       | <i>1983</i>               | <i>0.83</i>                 | <i>30.7</i> | <i>22.5</i> | <i>10.2</i> |
| Vietnam, Hanoi                              | 1991                | 1994              | 1993                      | 0.51                        | 2.2         | 18.9        | 3.3         |
| Zimbabwe, Harare, Africans                  | 1990                | 1994              | 1992                      | 0.49                        | 7.8         | 23.3        | 31.1        |

\*HDI data unavailable: Australia; Croatia; Czech Republic; Estonia; Iceland; Namibia; Nigeria, Ibadan; Puerto Rico; Singapore, Chinese; Singapore, Malay; Slovakia; Slovenia

\*\*Incidence data unavailable: Bangladesh; Pakistan, Islamabad; Pakistan, Karachi; Papua New Guinea; South Africa, Black; South Africa, White; United Arab Emirates, Al Ain

**SUPPLEMENTAL TABLE S2**

| <b>Neuroblastoma Risk SNP</b> | <b>Unadjusted</b>      |                | <b>Adjusted for HDI</b> |                |
|-------------------------------|------------------------|----------------|-------------------------|----------------|
|                               | <b>Beta (Std. Err)</b> | <b>P-value</b> | <b>Beta (Std. Err)</b>  | <b>P-value</b> |
| rs6939340                     | -54.6 (22.1)           | 0.04           | -16.4 (14)              | 0.29           |
| rs6435862                     | 95.7 (34.1)            | 0.03           | 18.2 (28.4)             | 0.54           |
| rs7587476                     | 33.4 (109.4)           | 0.77           | -28 (45.3)              | 0.56           |
| rs9295536                     | -40.4 (18.6)           | 0.07           | -8 (12)                 | 0.53           |
| rs110419                      | -31.7 (49)             | 0.54           | -23.7 (18.5)            | 0.25           |
| rs11037575                    | -33 (16.7)             | 0.09           | -7 (9.9)                | 0.51           |
| rs4712653                     | -43.9 (20.1)           | 0.07           | -8.3 (13.1)             | 0.55           |
| rs3768716                     | 193.3 (93.5)           | 0.08           | 13.2 (63.5)             | 0.84           |
| rs4336470                     | 13 (58.6)              | 0.83           | 34.8 (20)               | 0.13           |
| rs17065417                    | -113.3 (71.8)          | 0.16           | -12.9 (39.7)            | 0.76           |
| rs1027702                     | -0.5 (25.6)            | 0.98           | -16.7 (8.5)             | 0.10           |
| rs2619046                     | -35.2 (17)             | 0.08           | -12.4 (8.9)             | 0.21           |
| rs10055201                    | -34.9 (15.2)           | 0.06           | -11.2 (8.9)             | 0.25           |

  

| <b>Wilms Tumor Risk SNP</b> | <b>Unadjusted</b>      |                | <b>Adjusted for HDI</b> |                |
|-----------------------------|------------------------|----------------|-------------------------|----------------|
|                             | <b>Beta (Std. Err)</b> | <b>P-value</b> | <b>Beta (Std. Err)</b>  | <b>P-value</b> |
| rs3755132                   | -61.4 (29.3)           | 0.07           | -41.5 (28.1)            | 0.19           |
| rs1027643                   | 64.2 (88.8)            | 0.49           | 73.5 (67.8)             | 0.32           |
| rs790356                    | -22.4 (9.6)            | 0.05           | -15.4 (9.6)             | 0.16           |
| rs807624                    | -20.6 (6.3)            | 0.01           | -16.4 (5.3)             | 0.02           |
| rs2495478                   | -72.3 (36.7)           | 0.09           | -40.4 (40.5)            | 0.36           |
| rs2283873                   | -41 (9.5)              | 0.004          | -33.3 (8.6)             | 0.008          |

**SUPPLEMENTAL TABLE S3**

| <b>IARC Registry</b>            | <b>1000 Genomes Population</b>                              |
|---------------------------------|-------------------------------------------------------------|
| China, Tianjin                  | CHB: Han Chinese in Beijing, China                          |
| Colombia, Cali                  | CLM: Colombians from Medellin, Colombia                     |
| Finland                         | FIN: Finnish in Finland                                     |
| Italy                           | TSI: Toscani from Italy                                     |
| Japan                           | JPT: Japanese in Tokyo, Japan                               |
| Peru, Lima                      | PEL: Peruvians from Lima, Peru                              |
| Spain                           | IBS: Iberian population in Spain                            |
| United Kingdom, England & Wales | GBR: British in England and Scotland                        |
| USA, SEER, White                | CEU: Utah Residents with Northern and Western Ancestry, USA |
